# Supplementary material for: Hydrothermal temperature-driven evolution of morphology and electrocatalytic properties of hierarchical nanostructured CoFe-LDHs as highly efficient electrocatalysts for oxygen evolution reactions
Source: Royal Society of Chemistry journal article supplement (doi:10.1039/d1dt03101e), 2021-11-23
Supplement: d1dt03101e1.pdf [file d1dt03101e1.pdf]

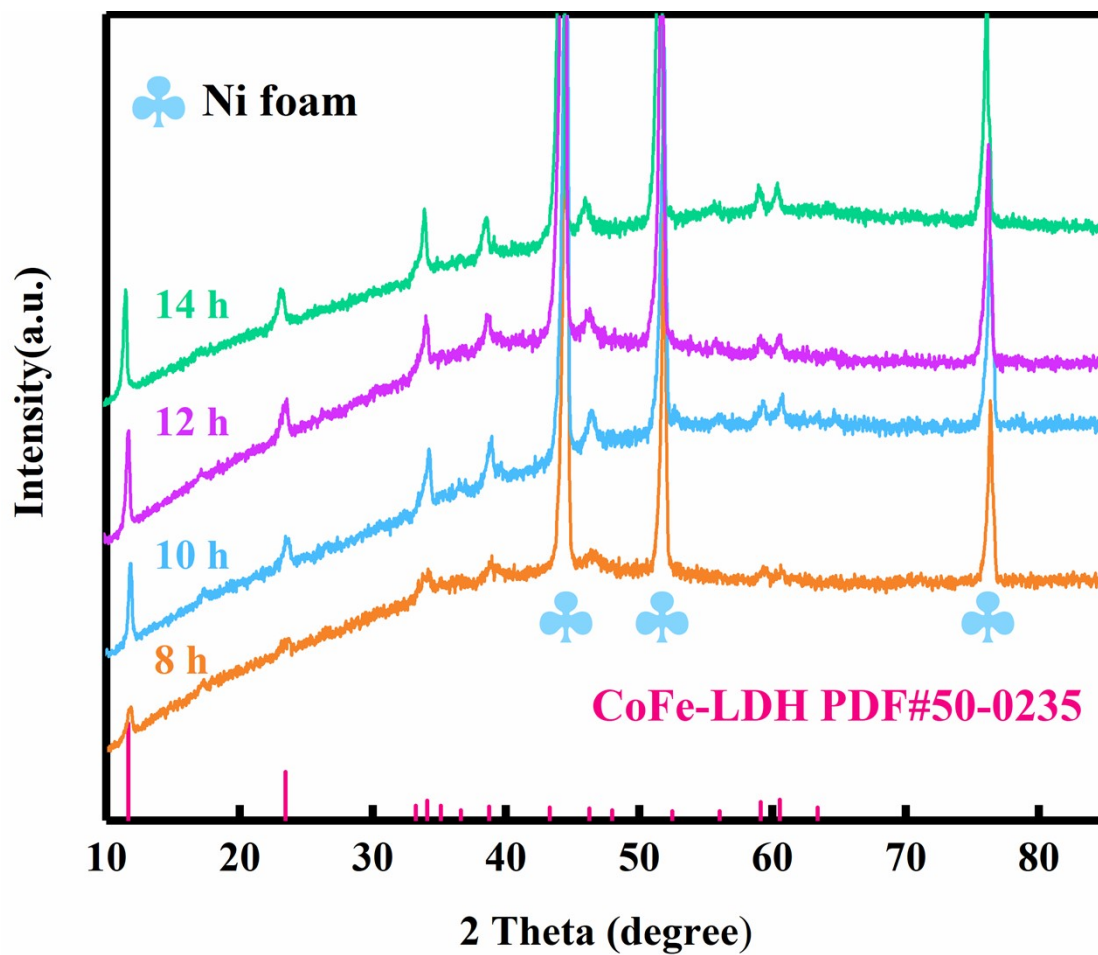

Fig. S1 XRD patterns for CoFe-LDH-120 at different hydrothermal times.

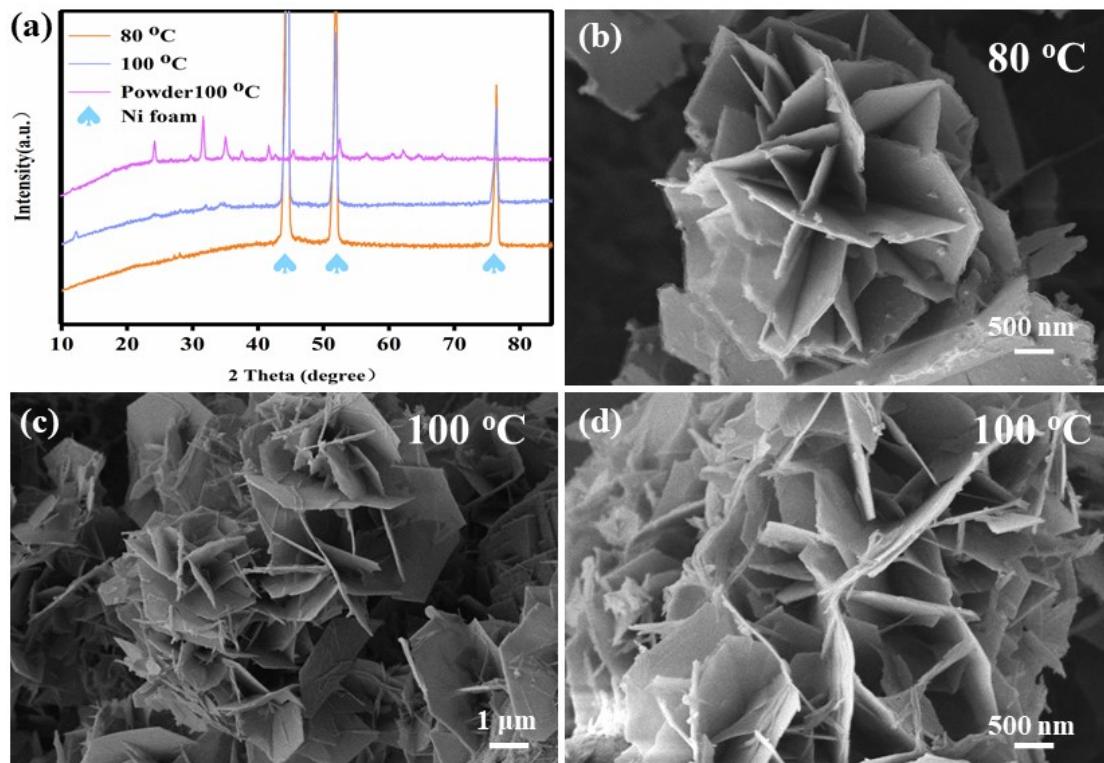

**Fig. S2** (a) XRD patterns for Fe(OH)<sub>3</sub> of different hydrothermal temperatures; SEM image of (b) Fe(OH)<sub>3</sub>/NF-80-12, (c and d) Fe(OH)<sub>3</sub>/NF-100-12.

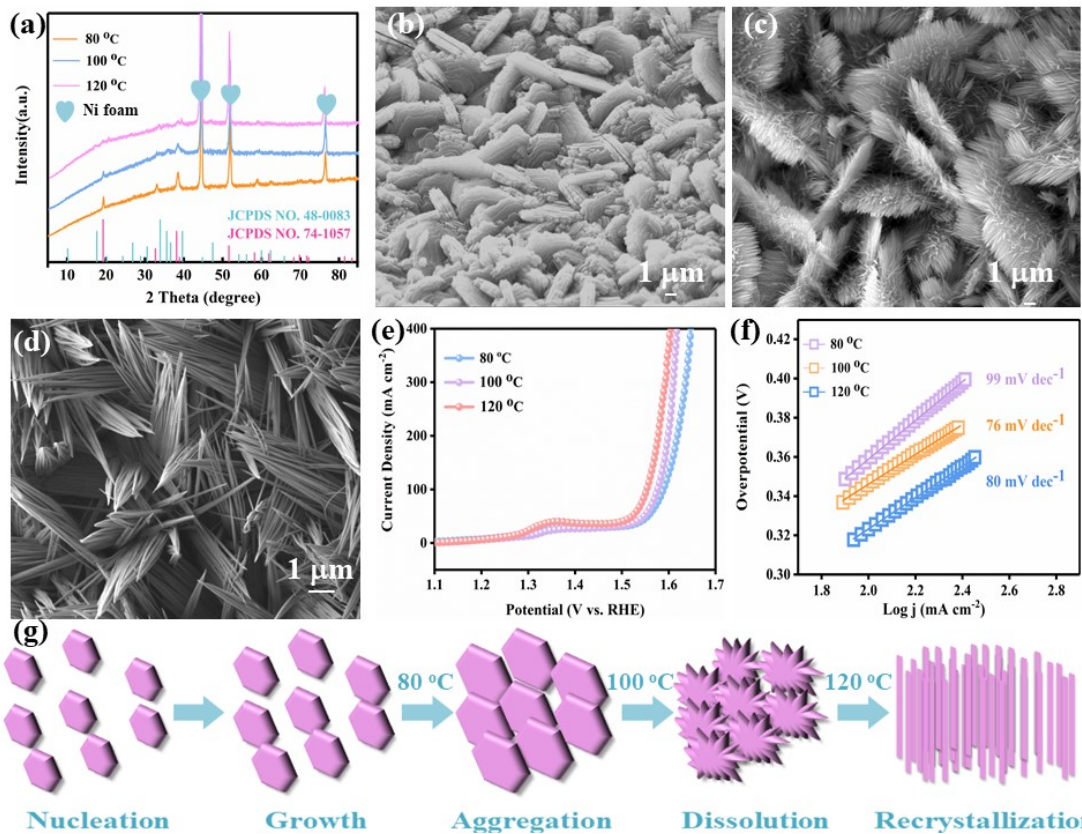

**Fig. S3** (a) XRD patterns for  $\text{Co(OH)}_2/\text{NF}$  of different hydrothermal temperatures; SEM image of (b)  $\text{Co(OH)}_2/\text{NF-80-12}$ , (c)  $\text{Co(OH)}_2/\text{NF-100-12}$  and (d)  $\text{Co(OH)}_2/\text{NF-120-12}$ ; (e) LSV curves and (f) Tafel plots of  $\text{Co(OH)}_2/\text{NF-x-12}$  ( $x=80, 100, 120$ ); (g) the growth process of CCH nanowires.

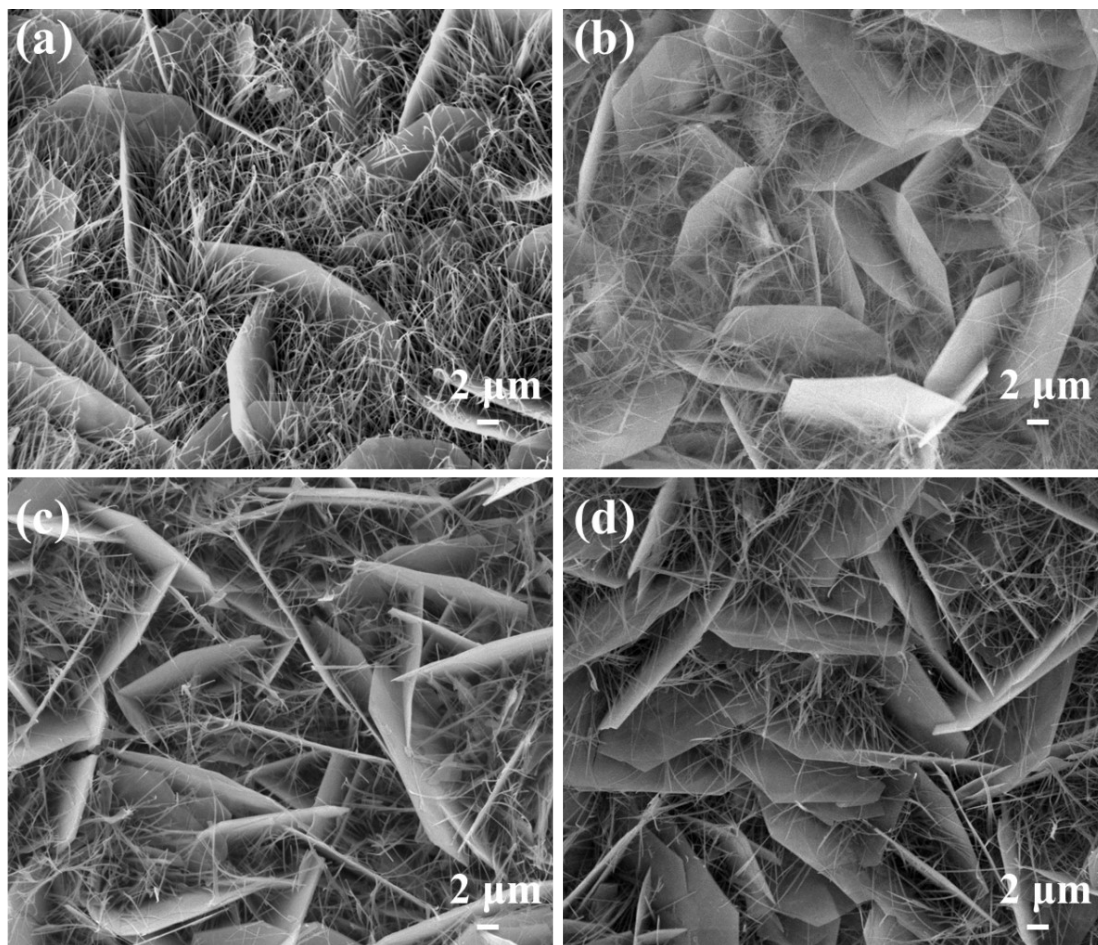

**Fig. S4** SEM image of (a) CoFe-LDH-120-8; (b) CoFe-LDH-120-10; (c) CoFe-LDH-120-12; (d) CoFe-LDH-120-14.

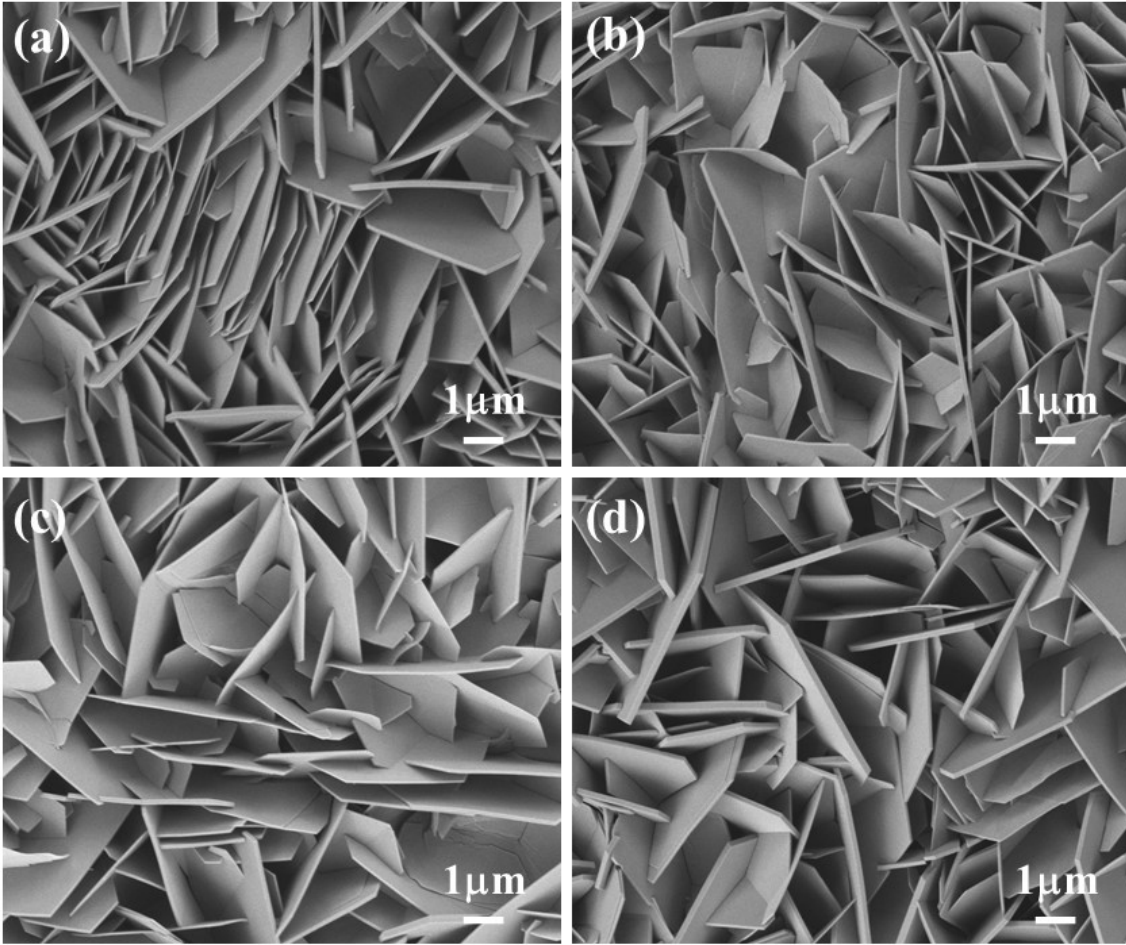

**Fig. S5** SEM image of (a) CoFe-LDH-80-8; (b) CoFe-LDH-80-10; (c) CoFe-LDH-80-12; (d) CoFe-LDH-80-14.

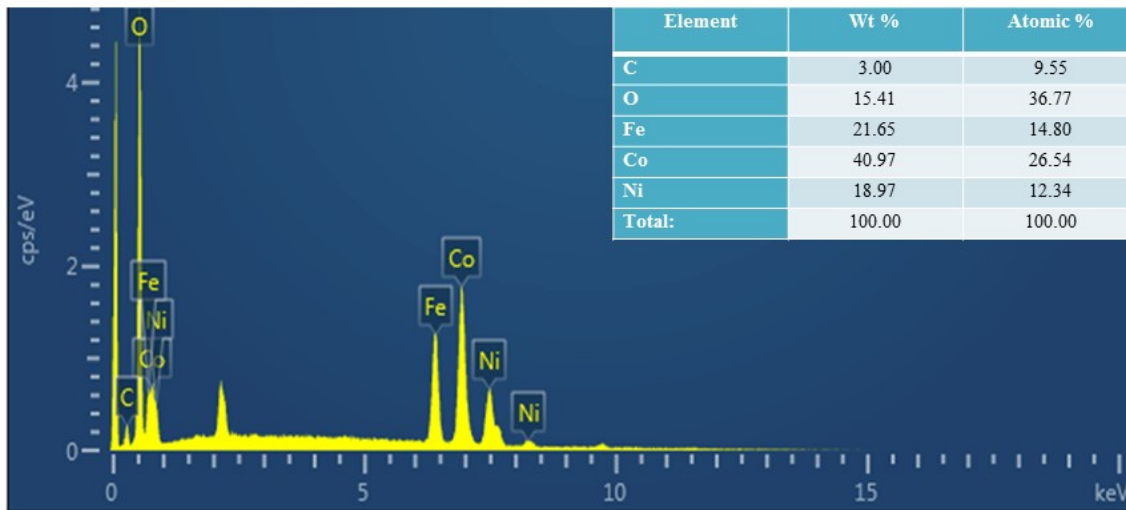

**Fig. S6** Typical energy-dispersive X-ray spectroscopy (EDS) for CoFe-LDH-120-12.

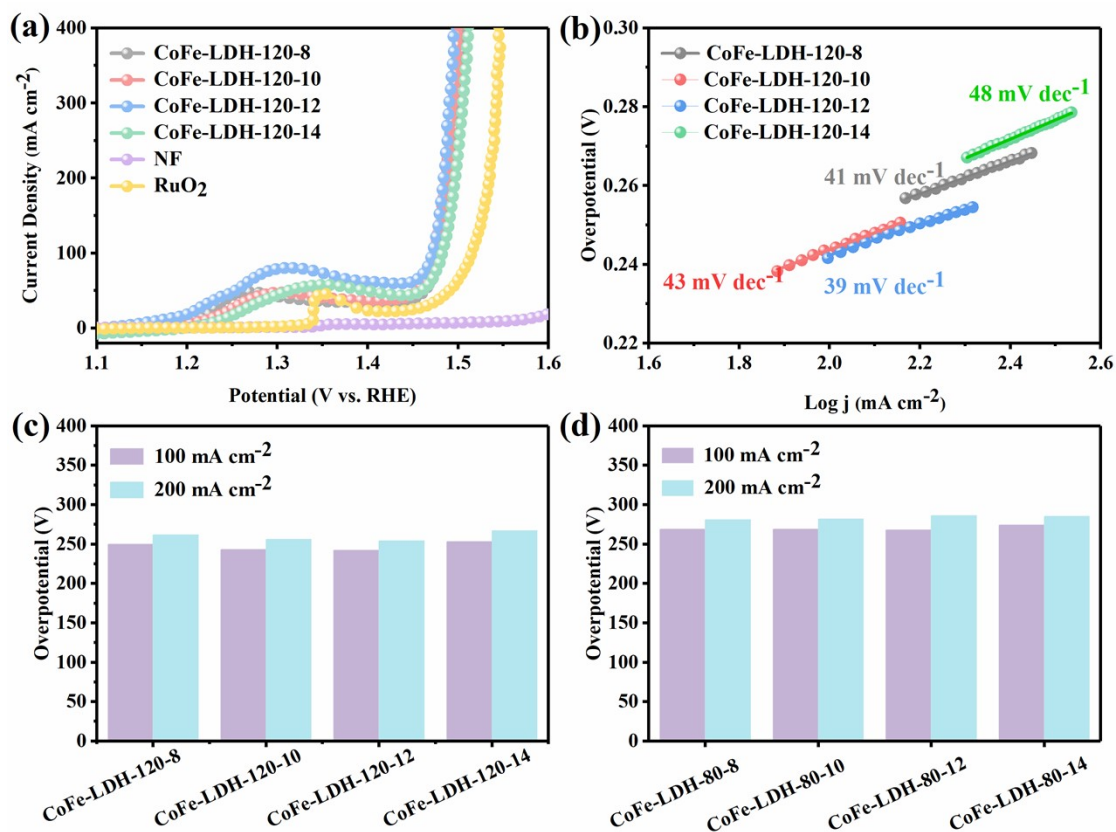

**Fig. S7** (a) LSV curves of CoFe-LDH-120-8, CoFe-LDH-120-10, CoFe-LDH-120-12, CoFe-LDH-120-14, Ni foam (NF) and RuO<sub>2</sub> in 1 M KOH solution (scan rate 2mV s<sup>-1</sup>); (b) Tafel plots of the corresponding synthesized catalysts; (c) Overpotential of CoFe-LDH-120-8, CoFe-LDH-120-10, CoFe-LDH-120-12, CoFe-LDH-120-14 at 100 and 200 mA cm<sup>-2</sup>; (d) Overpotentials of CoFe-LDH-80-8, CoFe-LDH-80-10, CoFe-LDH-80-12, CoFe-LDH-80-14 at 100 and 200 mA cm<sup>-2</sup>.

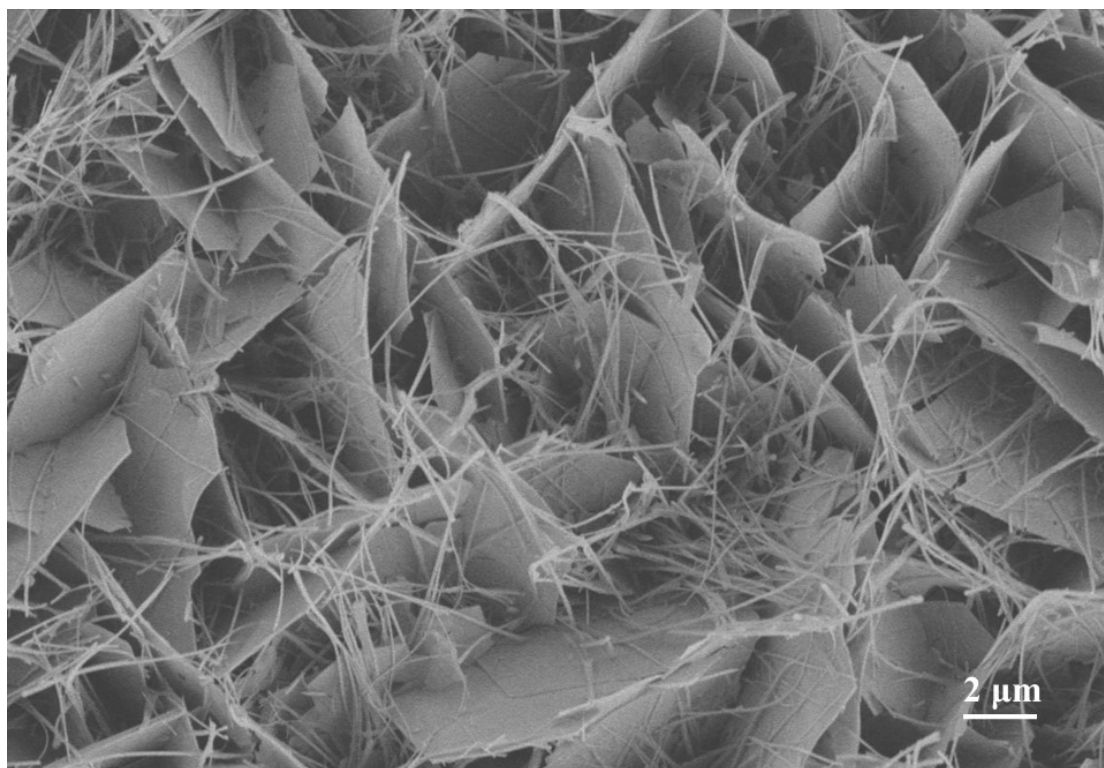

**Fig. S8** SEM image of CoFe-LDH-120 after continuous 97h OER measurement.



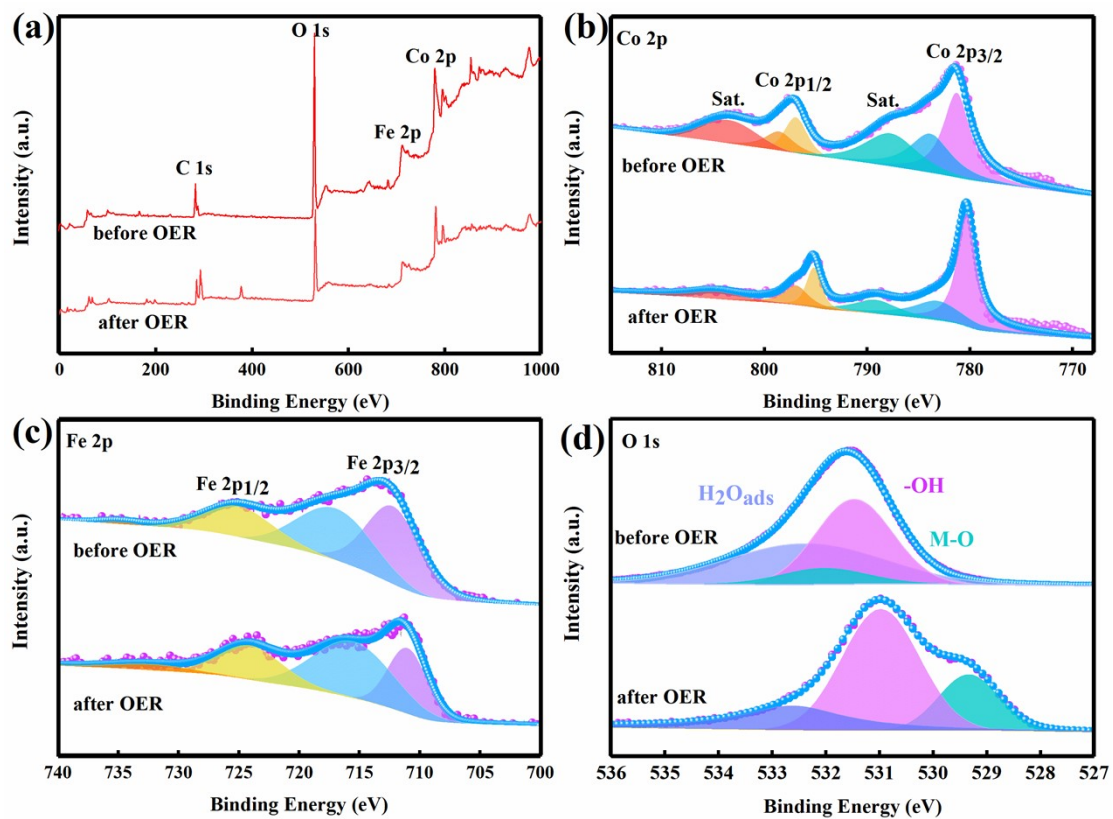

**Fig. S9** XPS full spectrum and XPS spectra of (b) Co 2p, (c) Fe 2p and (d) O 1s performed on CoFe-LDH-120-12 before and after long-term OER electrolysis.

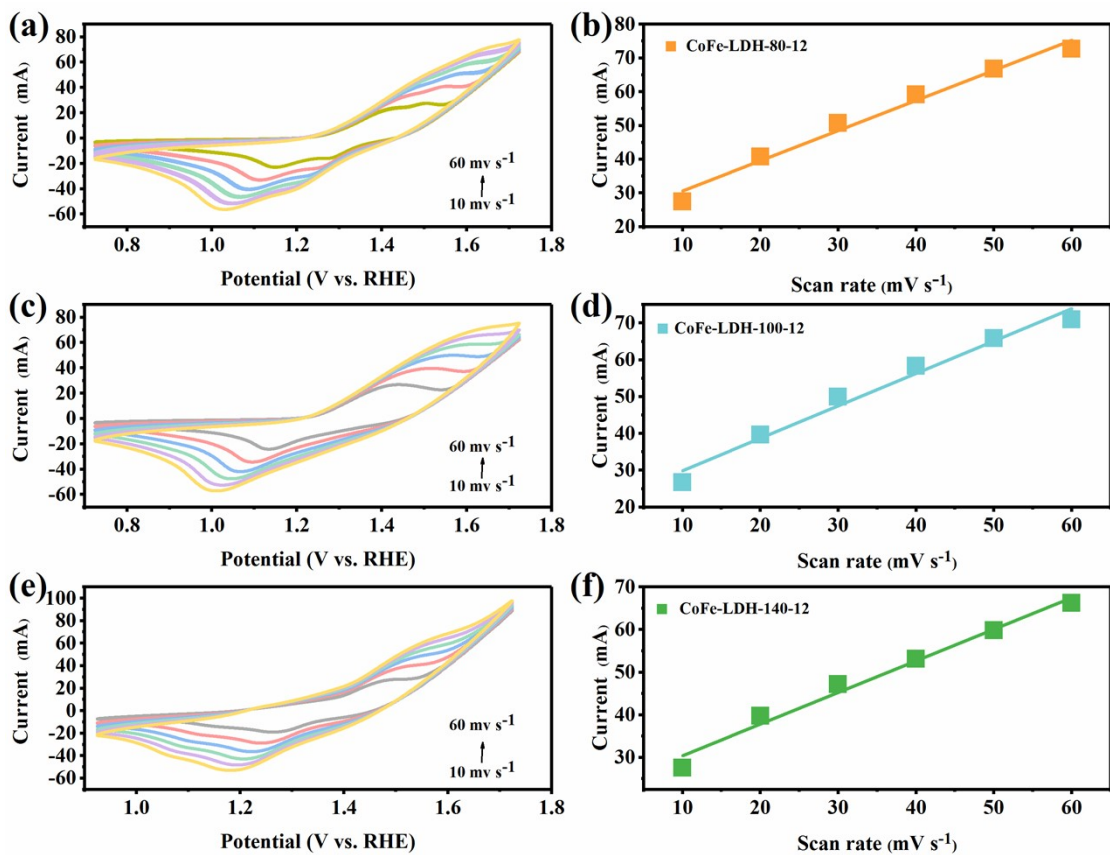

**Fig. S10** The CV curves of different rates of (a) CoFe-LDH-80-12, (c) CoFe-LDH-100-12, (e) CoFe-LDH-140-12; linear relationships of the oxidation peak currents vs. scan rates for (b) CoFe-LDH-80-12, (d) CoFe-LDH-100-12, (f) CoFe-LDH-140-12.

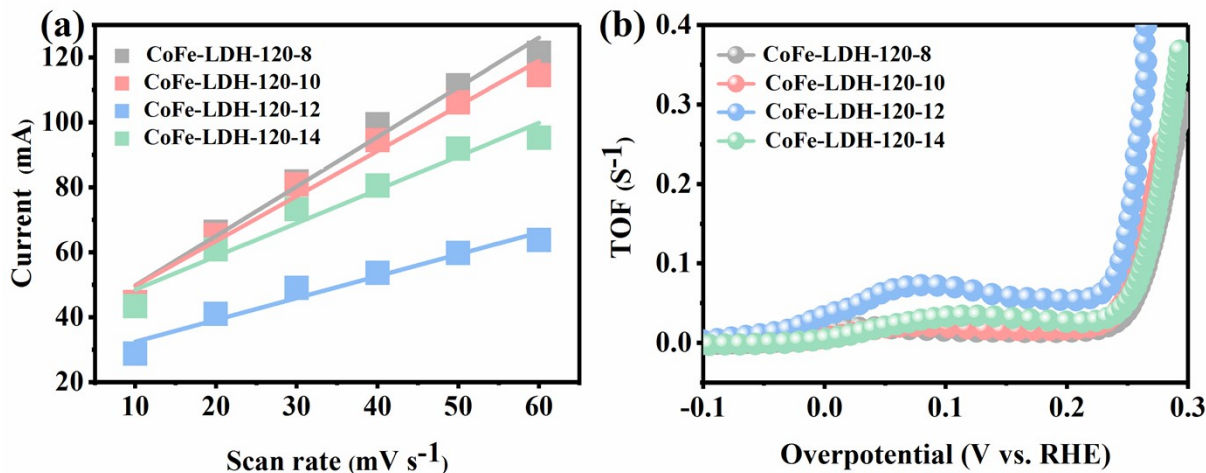

**Fig. S11** (a) Linear relationships of the oxidation peak currents vs. scan rates for CoFe-LDH-120-y (y=8, 10, 12, 14); (b) Turnover frequencies (TOFs) of CoFe-LDH-120- y (y=8, 10, 12, 14).
